# Supplementary material for: Amplified RLR signaling activation through an interferon-stimulated gene-endoplasmic reticulum stress-mitochondrial calcium uniporter protein loop
Source: PubMed Central journal article supplement (PMC4759556; doi:10.1038/srep20158), 2016-02-19
Supplement: srep20158-s1.pdf [file srep20158-s1.pdf]

## Supplemental information

**Title:** Amplified RLR signaling activation through an interferon-stimulated gene-endoplasmic reticulum stress-mitochondrial calcium uniporter protein loop

Jinbo Cheng<sup>1,3</sup>, Yajin Liao<sup>1,2,3</sup>, Lujun Zhou<sup>1,2</sup>, Shengyi Peng<sup>1</sup>, Hong Chen<sup>1</sup>, Zengqiang Yuan<sup>1,\*</sup>

<sup>1</sup>The State Key Laboratory of Brain and Cognitive Sciences, Institute of Biophysics, Chinese Academy of Sciences, Beijing 100101, China

<sup>2</sup>The College of Life Sciences, University of Chinese Academy of Sciences, Beijing 100049, China

<sup>3</sup>Co-first author

\*Corresponding author: Zengqiang Yuan, PhD. State Key Laboratory of Brain and Cognitive Sciences, Institute of Biophysics, Chinese Academy of Sciences, Beijing 100101, China. Email: [zqyuan@ibp.ac.cn](mailto:zqyuan@ibp.ac.cn);

A

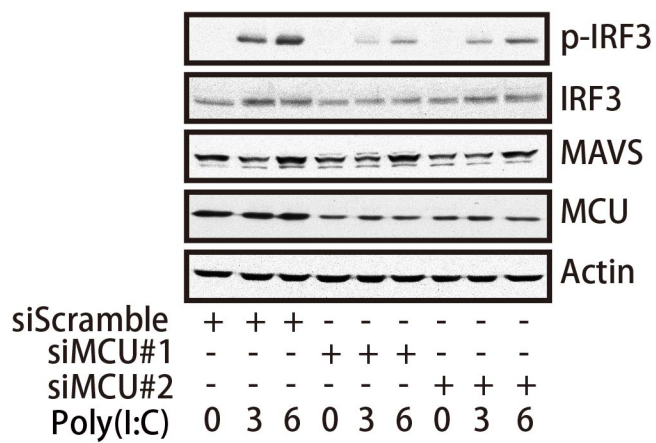

B

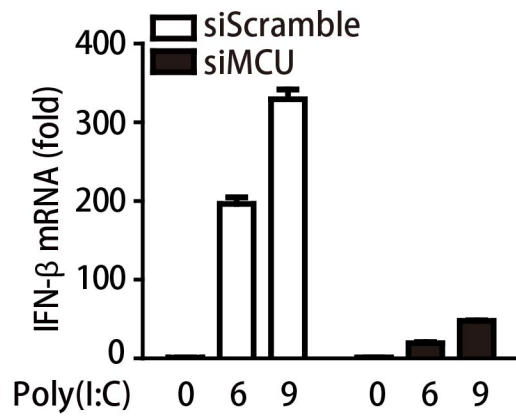

A

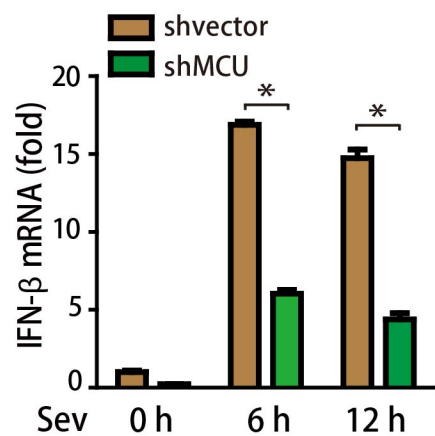

B

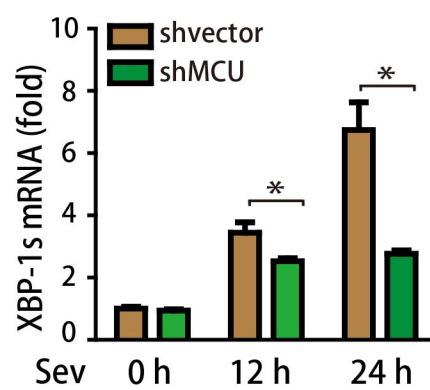

C

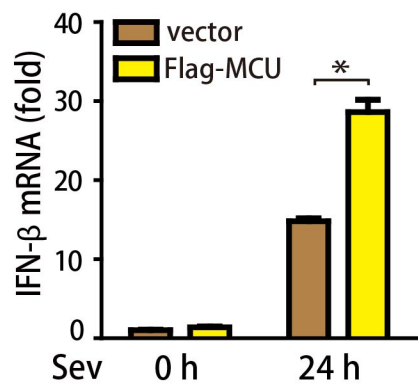

D

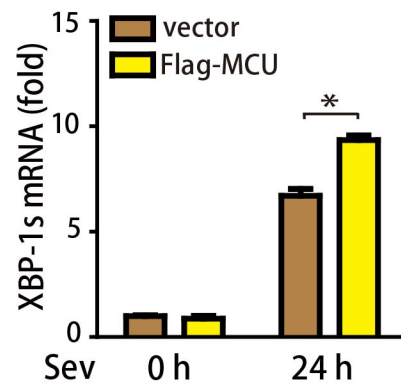

A

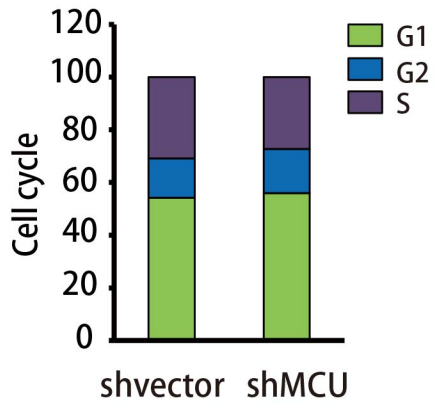

A

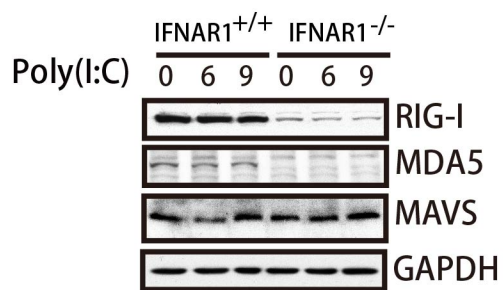

B

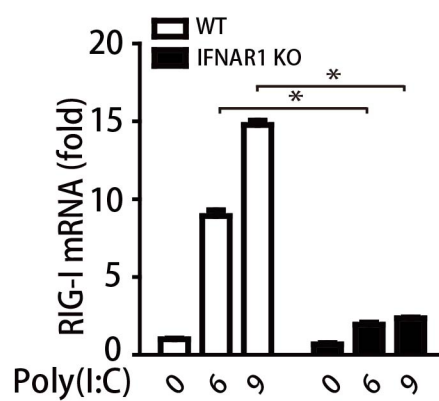

C

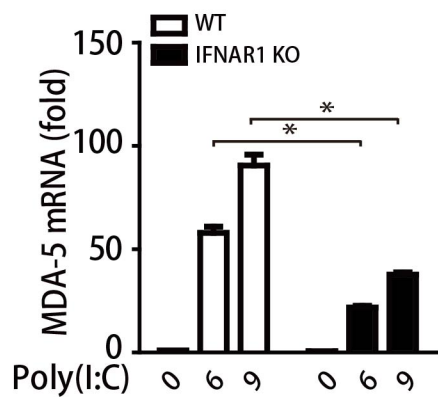

## Figure legends

**Figure S1.** Transient knockdown of MCU decreased poly(I:C)-induced RLR signaling activation. (A) HeLa cells were transfected with MCU targeting siRNAs (siRNA#1 and siRNA#2) and then treated with 1  $\mu\text{g}/\text{mL}$  poly(I:C) for different time as indicated. Cell lysates from these cells were immunoblotted with p-IRF3, IRF-3, MAVS, MCU and Actin. (B) HeLa cells were transfected with MCU targeting siRNA#1 and then treated with 1  $\mu\text{g}/\text{mL}$  poly(I:C) for different time as indicated. IFN- $\beta$  mRNA levels from these cells were detected by qPCR.

**Figure S2.** MCU impairs SeV infection-induced RLR signaling activation and ER stress. (A, B) Stable MCU knockdown HeLa cells or control cells were treated with SeV for different time. IFN- $\beta$  mRNA levels and XBP-1s levels from these cells were detected by qPCR. (C, D) HeLa cells transfected with Flag-MCU or vector were treated with SeV for different time, and then IFN- $\beta$  mRNA levels and XBP-1s levels from these cells were detected by qPCR.

**Figure S3.** MCU knockdown did not impair cell cycle parameters. (A) Stable MCU knockdown HeLa cells or control cells were analyzed cell cycle by flow cytometry.

**Figure S4.** IFNAR1 signaling impairs the expressions of RIG-I and MDA-5. (A) WT and *IFNAR1*<sup>-/-</sup> MEF cells were treated with 1  $\mu\text{g}/\text{mL}$  poly(I:C) for different time as indicated, and then immunoblotted with RIG-I, MDA-5, MAVS and GAPDH. (B-C) mRNA levels of RIG-I and MDA-5 from these cells were detected by qPCR.
